# Supplementary material for: A coumarin–dihydroperimidine dye as a fluorescent chemosensor for hypochlorite in 99% water
Source: PubMed Central journal article supplement (PMC9071195; doi:10.1039/c9ra05533a), 2019-09-11
Supplement: RA-009-C9RA05533A-s001.pdf [file RA-009-C9RA05533A-s001.pdf]

## Electronic Supplementary Information (ESI†)

### A coumarin–dihydroperimidine dye as a fluorescent chemosensor for hypochlorite in 99% water

Yasuhiro Shiraishi,\* Chiharu Yamada and Takayuki Hirai

*Research Center for Solar Energy Chemistry, and Division of Chemical Engineering,  
Graduate School of Engineering Science, Osaka University, Toyonaka 560-8531, Japan*

*shiraish@cheng.es.osaka-u.ac.jp*

## CONTENTS

|                                                                                          | Page |
|------------------------------------------------------------------------------------------|------|
| <b>Table S1</b> TD-DFT calculation results for <b>1</b> , <b>1'</b> and <b>1''</b> ..... | 2    |
| <b>Fig. S1</b> <sup>1</sup> H NMR chart of <b>1</b> .....                                | 4    |
| <b>Fig. S2</b> <sup>13</sup> C NMR chart of <b>1</b> .....                               | 5    |
| <b>Fig. S3</b> FAB-MS chart of <b>1</b> .....                                            | 6    |
| <b>Fig. S4</b> Absorption spectra of <b>1</b> .....                                      | 7    |
| <b>Fig. S5</b> <sup>1</sup> H NMR chart of <b>1'</b> .....                               | 8    |
| <b>Fig. S6</b> <sup>13</sup> C NMR chart of <b>1'</b> .....                              | 9    |
| <b>Fig. S7</b> FAB-MS chart of <b>1'</b> .....                                           | 10   |
| <b>Fig. S8</b> <sup>1</sup> H– <sup>1</sup> H COSY chart of <b>1</b> .....               | 11   |
| <b>Fig. S9</b> <sup>1</sup> H– <sup>1</sup> H COSY chart of <b>1'</b> .....              | 12   |
| <b>Fig. S10</b> Effect of water content on the fluorescence intensity of <b>1</b> .....  | 13   |
| <b>Cartesian coordinates for respective compounds</b> .....                              | 14   |

**Table S1.** Calculated excitation energy ( $E$ ), wavelength ( $\lambda$ ), and oscillator strength ( $f$ ) for low-lying singlet state ( $S_n$ ) of **1**, **1'** and **1''**.<sup>[a]</sup>

| compound                            | Main orbital transition (CIC <sup>[b]</sup> ) | $E$ (eV) [ $\lambda$ (nm)]             | $f$                               |                       |
|-------------------------------------|-----------------------------------------------|----------------------------------------|-----------------------------------|-----------------------|
| <b>1</b>                            | $S_0 \rightarrow S_1$                         | HOMO $\rightarrow$ LUMO (0.70571)      | 2.2918 eV [540.99 nm]             | 0.0023                |
|                                     | $S_0 \rightarrow S_2$                         | HOMO-1 $\rightarrow$ LUMO (0.70440)    | 3.0942 eV [400.70 nm]             | 0.0000                |
|                                     | $S_0 \rightarrow S_3$                         | HOMO $\rightarrow$ LUMO+1 (0.70406)    | 3.3076 eV [374.84 nm]             | 0.0008                |
|                                     | $S_0 \rightarrow S_4$                         | HOMO $\rightarrow$ LUMO+2 (0.65062)    | 3.7590 eV [329.83 nm]             | 0.1681                |
|                                     |                                               | HOMO $\rightarrow$ LUMO+4 (-0.10429)   |                                   |                       |
|                                     | $S_0 \rightarrow S_5$                         | HOMO $\rightarrow$ LUMO+3 (0.66998)    | 3.8658 eV [320.72 nm]             | 0.0014                |
|                                     |                                               | HOMO $\rightarrow$ LUMO+5 (-0.13878)   |                                   |                       |
|                                     | $S_0 \rightarrow S_6$                         | HOMO $\rightarrow$ LUMO+6 (-0.12101)   | 3.9242 eV [315.95 nm]             | 0.0031                |
|                                     |                                               | HOMO-2 $\rightarrow$ LUMO (0.67869)    |                                   |                       |
|                                     | <b>1'</b>                                     | $S_0 \rightarrow S_1$                  | HOMO $\rightarrow$ LUMO (0.67202) | 2.5622 eV [483.90 nm] |
| HOMO $\rightarrow$ LUMO+1 (0.15556) |                                               |                                        |                                   |                       |
| $S_0 \rightarrow S_2$               |                                               | HOMO $\rightarrow$ LUMO (-0.18684)     | 2.8956 eV [428.17 nm]             | 0.0152                |
|                                     |                                               | HOMO $\rightarrow$ LUMO+1 (0.66377)    |                                   |                       |
| $S_0 \rightarrow S_3$               |                                               | HOMO-2 $\rightarrow$ LUMO+3 (-0.10524) | 3.7678 eV [329.06 nm]             | 0.2785                |
|                                     |                                               | HOMO-1 $\rightarrow$ LUMO+1 (0.12636)  |                                   |                       |
|                                     |                                               | HOMO $\rightarrow$ LUMO+2 (0.62423)    |                                   |                       |
| $S_0 \rightarrow S_4$               |                                               | HOMO $\rightarrow$ LUMO+3 (-0.10333)   | 3.8169 eV [324.83 nm]             | 0.172                 |
|                                     |                                               | HOMO-3 $\rightarrow$ LUMO (0.13294)    |                                   |                       |
|                                     |                                               | HOMO-3 $\rightarrow$ LUMO+4 (-0.11075) |                                   |                       |
| $S_0 \rightarrow S_5$               | HOMO-1 $\rightarrow$ LUMO (0.58062)           | 3.9169 eV [316.53 nm]                  | 0.0572                            |                       |
|                                     | HOMO-1 $\rightarrow$ LUMO+1 (0.26085)         |                                        |                                   |                       |
| $S_0 \rightarrow S_6$               | HOMO-2 $\rightarrow$ LUMO+2 (0.20599)         | 3.9693 eV [312.36 nm]                  | 0.2865                            |                       |
|                                     | HOMO-1 $\rightarrow$ LUMO+1 (0.29346)         |                                        |                                   |                       |
|                                     | HOMO $\rightarrow$ LUMO+3 (0.56823)           |                                        |                                   |                       |
|                                     | HOMO-3 $\rightarrow$ LUMO (0.14907)           |                                        |                                   |                       |
| <b>1''</b>                          | $S_0 \rightarrow S_1$                         | HOMO-2 $\rightarrow$ LUMO+2 (-0.11040) | 2.8187 eV [439.87 nm]             | 0.0095                |
|                                     | $S_0 \rightarrow S_6$                         | HOMO-1 $\rightarrow$ LUMO (-0.26941)   |                                   |                       |
|                                     |                                               | HOMO-1 $\rightarrow$ LUMO+1 (0.51253)  |                                   |                       |
|                                     |                                               | HOMO $\rightarrow$ LUMO+2 (-0.13810)   |                                   |                       |
| $S_0 \rightarrow S_6$               | HOMO $\rightarrow$ LUMO+3 (-0.24763)          |                                        |                                   |                       |

|                                 |                            |                       |        |
|---------------------------------|----------------------------|-----------------------|--------|
|                                 | HOMO → LUMO+1 (0.12792)    |                       |        |
| S <sub>0</sub> → S <sub>2</sub> | HOMO → LUMO (-0.14003)     | 3.2523 eV [381.22 nm] | 0.0010 |
|                                 | HOMO → LUMO+1 (0.68548)    |                       |        |
| S <sub>0</sub> → S <sub>3</sub> | HOMO-1 → LUMO (0.59565)    | 3.2670 eV [379.50 nm] | 0.2737 |
|                                 | HOMO-1 → LUMO+1 (0.29465)  |                       |        |
| S <sub>0</sub> → S <sub>4</sub> | HOMO-1 → LUMO (-0.27485)   | 3.6413 eV [340.50 nm] | 0.3661 |
|                                 | HOMO-1 → LUMO+1 (0.58007)  |                       |        |
| S <sub>0</sub> → S <sub>5</sub> | HOMO-7 → LUMO (0.10009)    | 3.8806 eV [319.49 nm] | 0.1753 |
|                                 | HOMO-3 → LUMO+3 (0.11442)  |                       |        |
|                                 | HOMO → LUMO+2 (0.63331)    |                       |        |
| S <sub>0</sub> → S <sub>6</sub> | HOMO-3 → LUMO+1 (-0.29114) | 4.0682 eV [304.76 nm] | 0.1186 |
|                                 | HOMO-1 → LUMO+2 (-0.11142) |                       |        |
|                                 | HOMO → LUMO+3 (0.61780)    |                       |        |

[a] The optimized structures for the respective models are summarized in the end of this ESI.

[b] CI expansion coefficients for the main transitions.

```

DFFILE 20180119_DWMP_Proton-1-1_1-p-ala
COMET single_pulse
DATE_ 18-01-19 12:26:32
NAME 1
PULPROG zgpg30
PROBHD 5mm
PULPROG proton_1xp
CHPFO 359.78 MHz
CHSEI 4.19 kHz
CHFTN 7.29 Hz
FOUNT 13107
SFO 80001.68 Hz
SCANS 8
AQ 1.6384 sec
PD 5.0000 sec
PC 5.25 usec
PWL 1H
LEN 30.0 c
RG 1798
SOLNT DMSO
EXPT 0.00 ppm
EXRF 0.12 Hz
BF 36
RGAIN

```

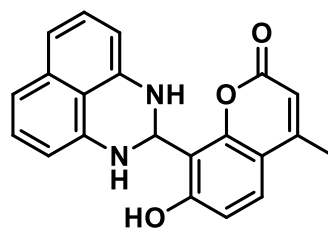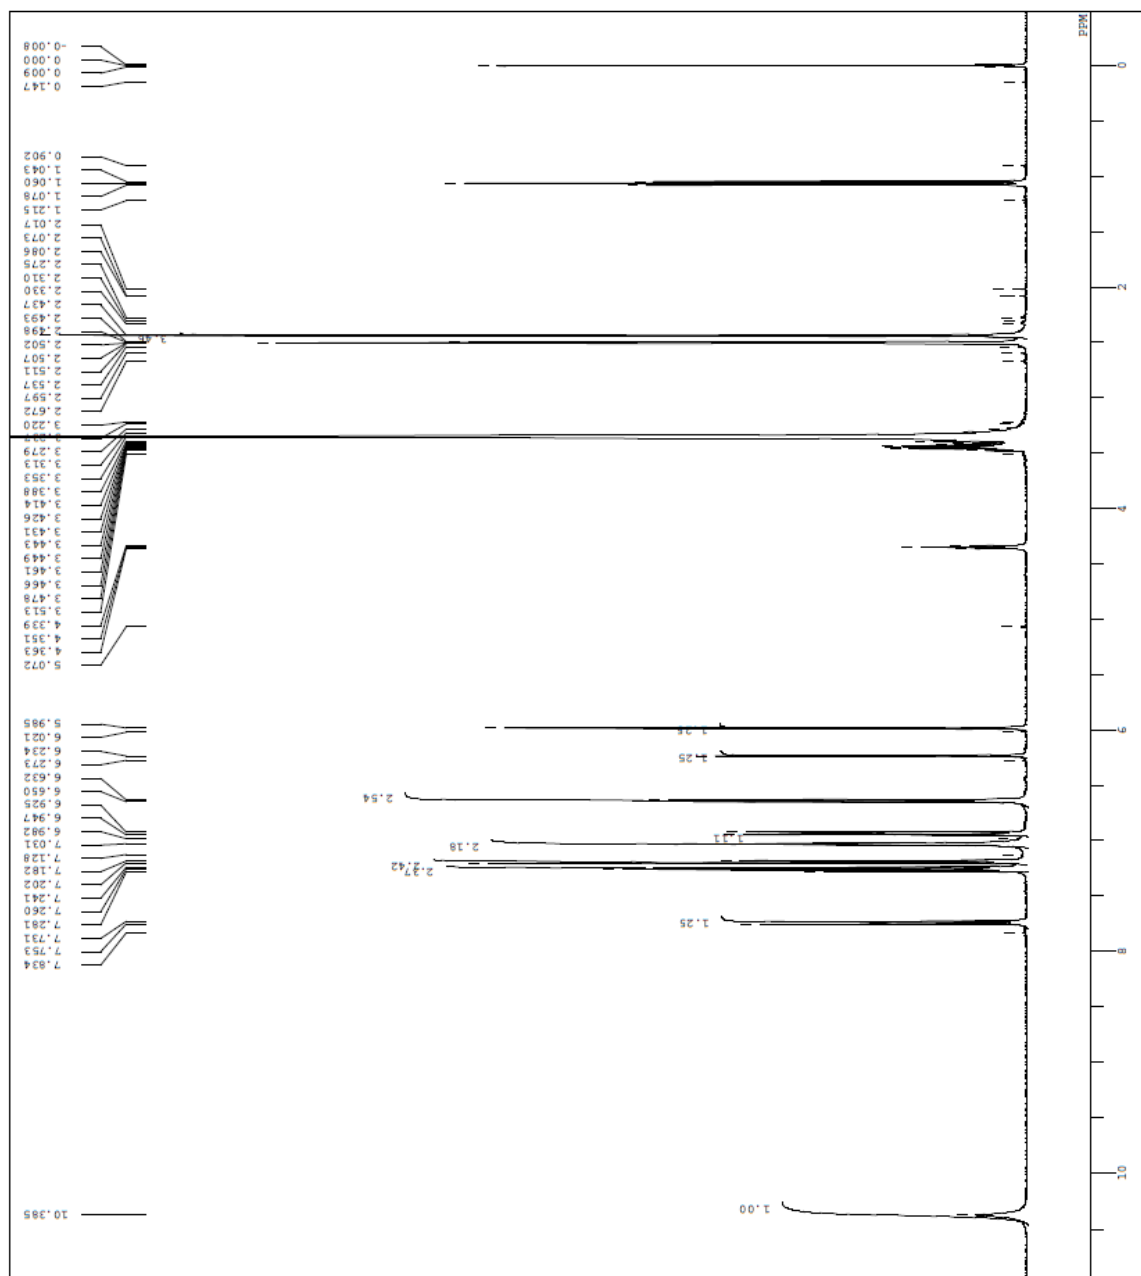

**Fig. S1** <sup>1</sup>H NMR chart of **1** (24 mM, DMSO-d<sub>6</sub>, 400 MHz).

20181205\_CMRP\_Carbon-1-1.fdf  
COMPT 2018-12-05 21:39:49  
DATE\_ 2018-12-05 21:39:49  
CHN1C 13C  
EXMOD carbon.jsp  
EXPROQ 100.53 MHz  
OBSETT 5.35 kHz  
PULPROG zgpg30  
PPOINT 32767  
PRBROU 31407.04 Hz  
SCANS 4096  
ACQTIM 1.0433 sec  
PD 2.0000 sec  
PULPROG 1H  
PCYCLE 4.33 usec  
CTEMP 30.0 c  
SOLVENT DMSO  
EXREF  
RF 1.20 Hz  
RGAIN 50

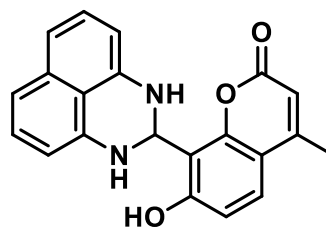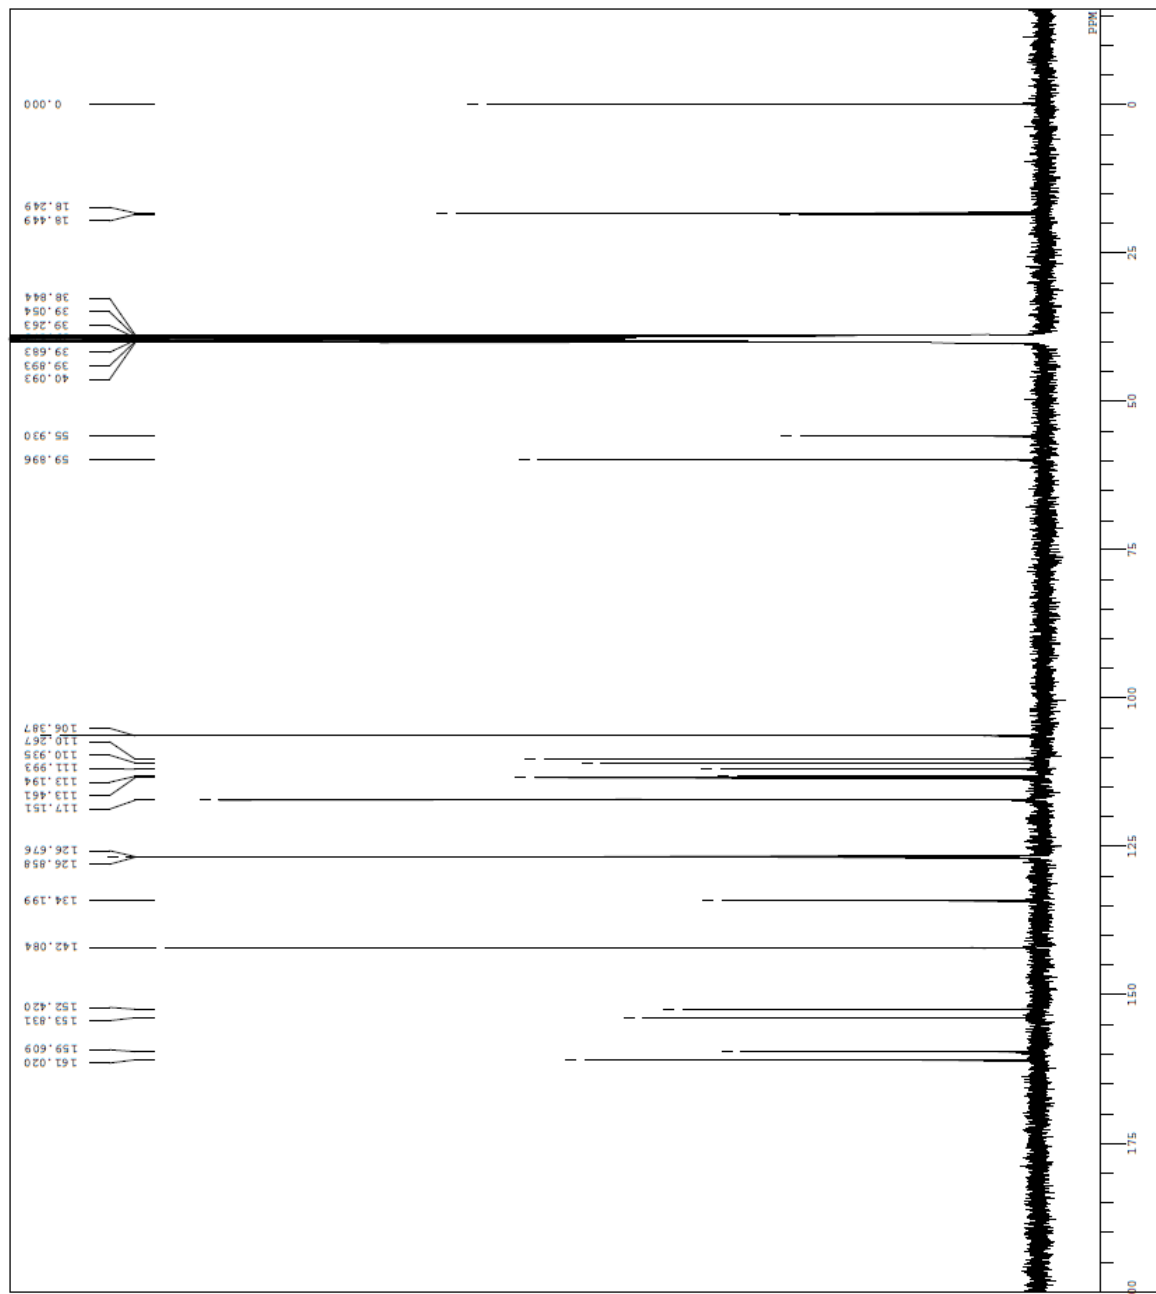

Fig. S2  $^{13}\text{C}$  NMR chart of **1** (48 mM, DMSO- $d_6$ , 100 MHz).

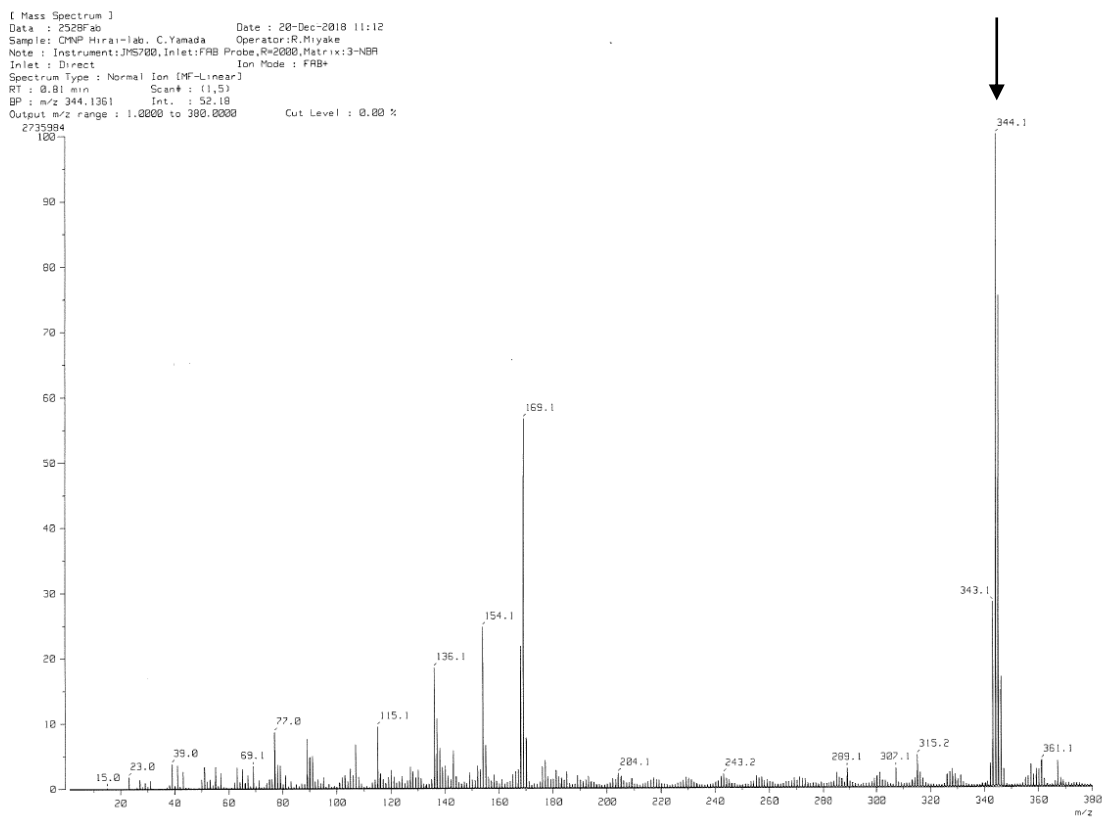

$C_{21}H_{16}O_3N_2^+$  ( $M^+$ )  $m/z$  344.1158  
 (Calculated:  $C_{21}H_{16}O_3N_2^+$  ( $M^+$ )  $m/z$  344.1161)

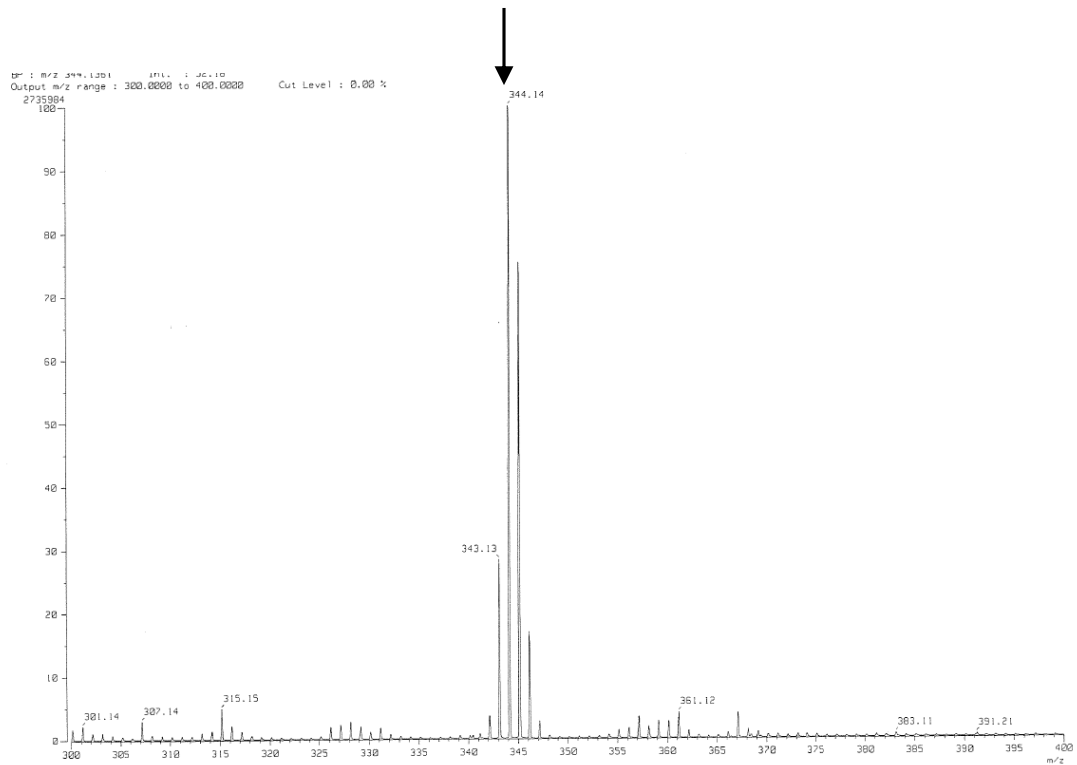

**Fig. S3** FAB-MS chart of **1**. (top) full and (bottom) partial charts.

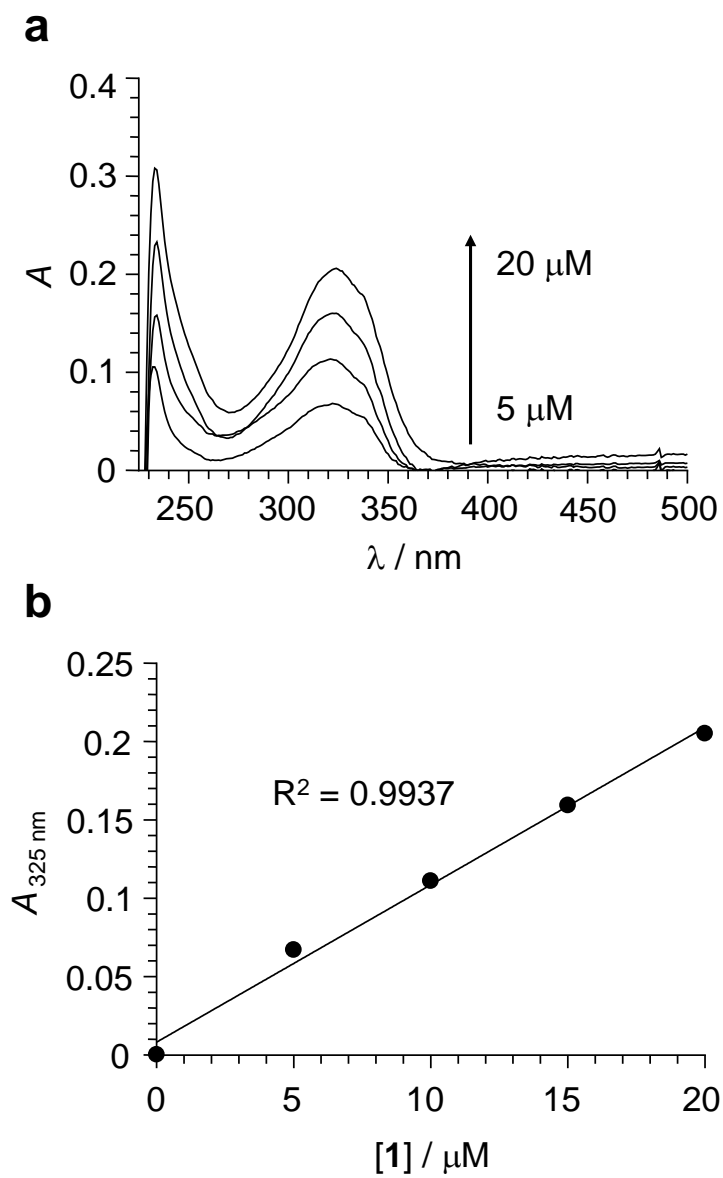

**Fig. S4** (a) Change in absorption spectra of **1** measured at 25 °C in 1% MeCN solutions (HEPES 0.1 M, pH 7.0) with different concentration of **1**. (b) Change in the absorbance at 325 nm as a function of the concentration of **1**.

```

DFFILE 20180208_cmp-8eq_Procton-1.2.1.1_p-als
COMNT single_pulse
DATIM 2018-02-08 16:56:53
CRDUC 1H
PROBHD 5mm
PULPROG zgpg30
PROTON1 1H
NUC1 13C
ORBIT 78 MHz
OBREV 4.19 KHz
OBFIN 7.29 KHz
POINT 13107
PREP0 8000.00 Hz
PULSE 1.6384 sec
AQTM 5.0000 sec
PD 5.25 usec
PWL 1H
IRDUC 1H
CTEMP 30.0 c
SOLVENT DMSO
EXPT2 0.00 ppm
EXPT3 0.12 Hz
HF 14
RGAIN

```

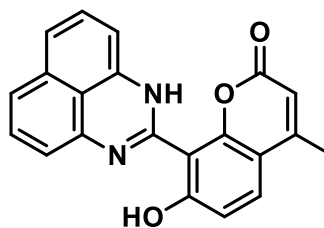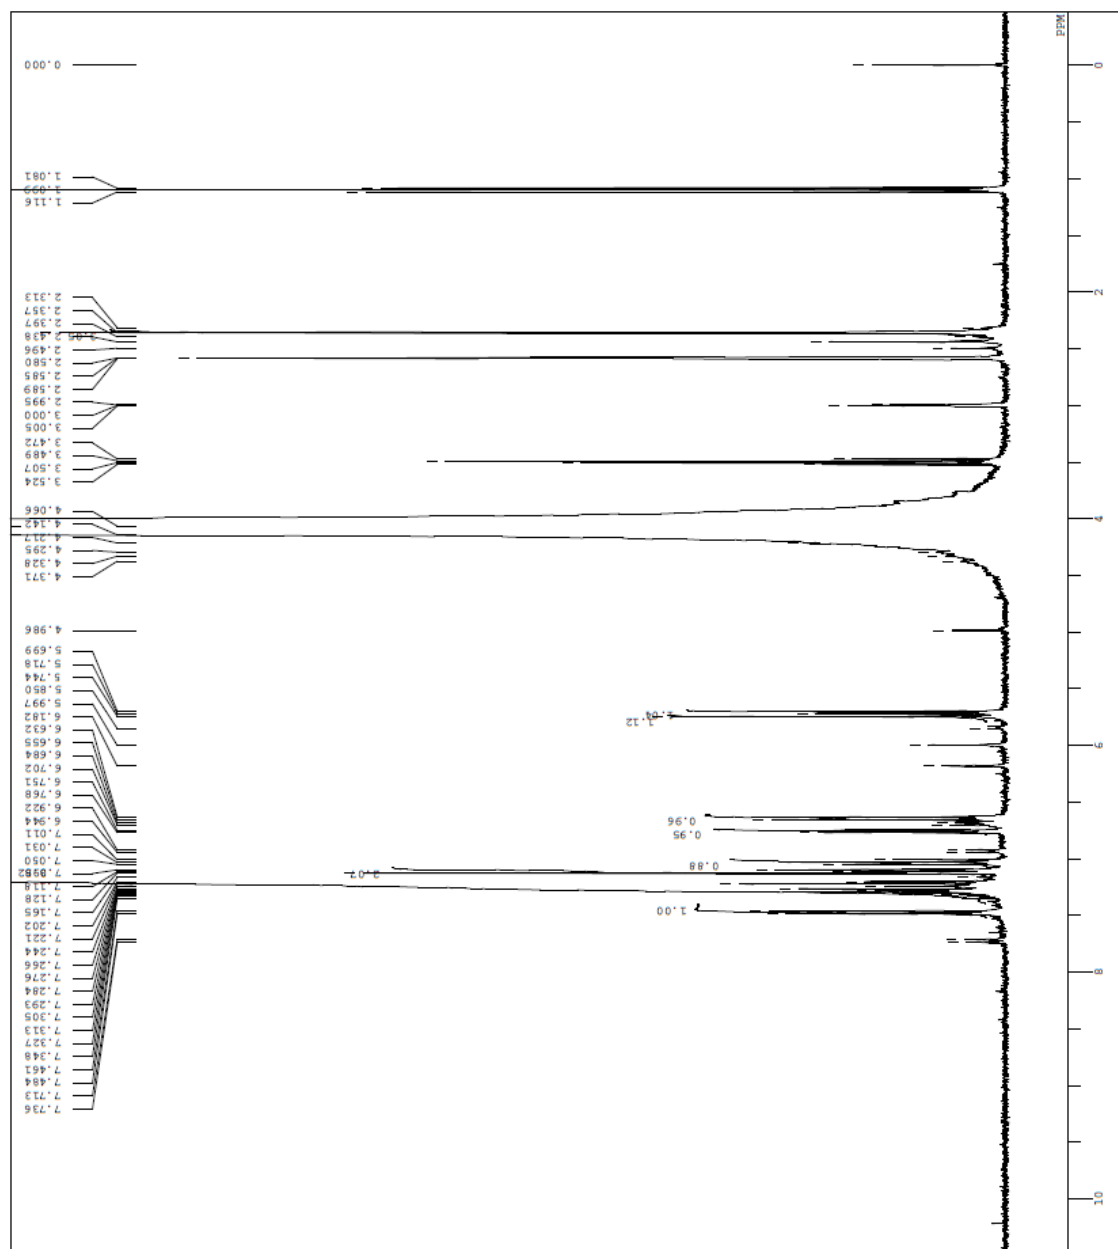

Fig. S5 <sup>1</sup>H NMR chart of 1' (24 mM, DMSO-d<sub>6</sub>, 400 MHz).



```

D:\FILE 20181225 CNMP-C10 Carbon-1- PDP-p-ala
COUNT single pulse decoupled gated NOE
DATE_ 2018-12-25 21:09:32
NAME_ 13C
EXPNO 1
PROCNO 1
PROCFT 1
PROCBS 1
SCANS 4096
AQTM 1.0433 sec
PD 2.0000 sec
PRG 3.80 usec
NAMEC 1H
CTEMP 30.0 c
SOLVENT DMSO
KRGREP 39.50 PPM
KRGRES 1.50 Hz
RGAIN

```

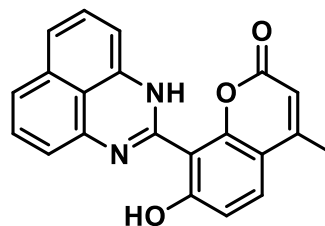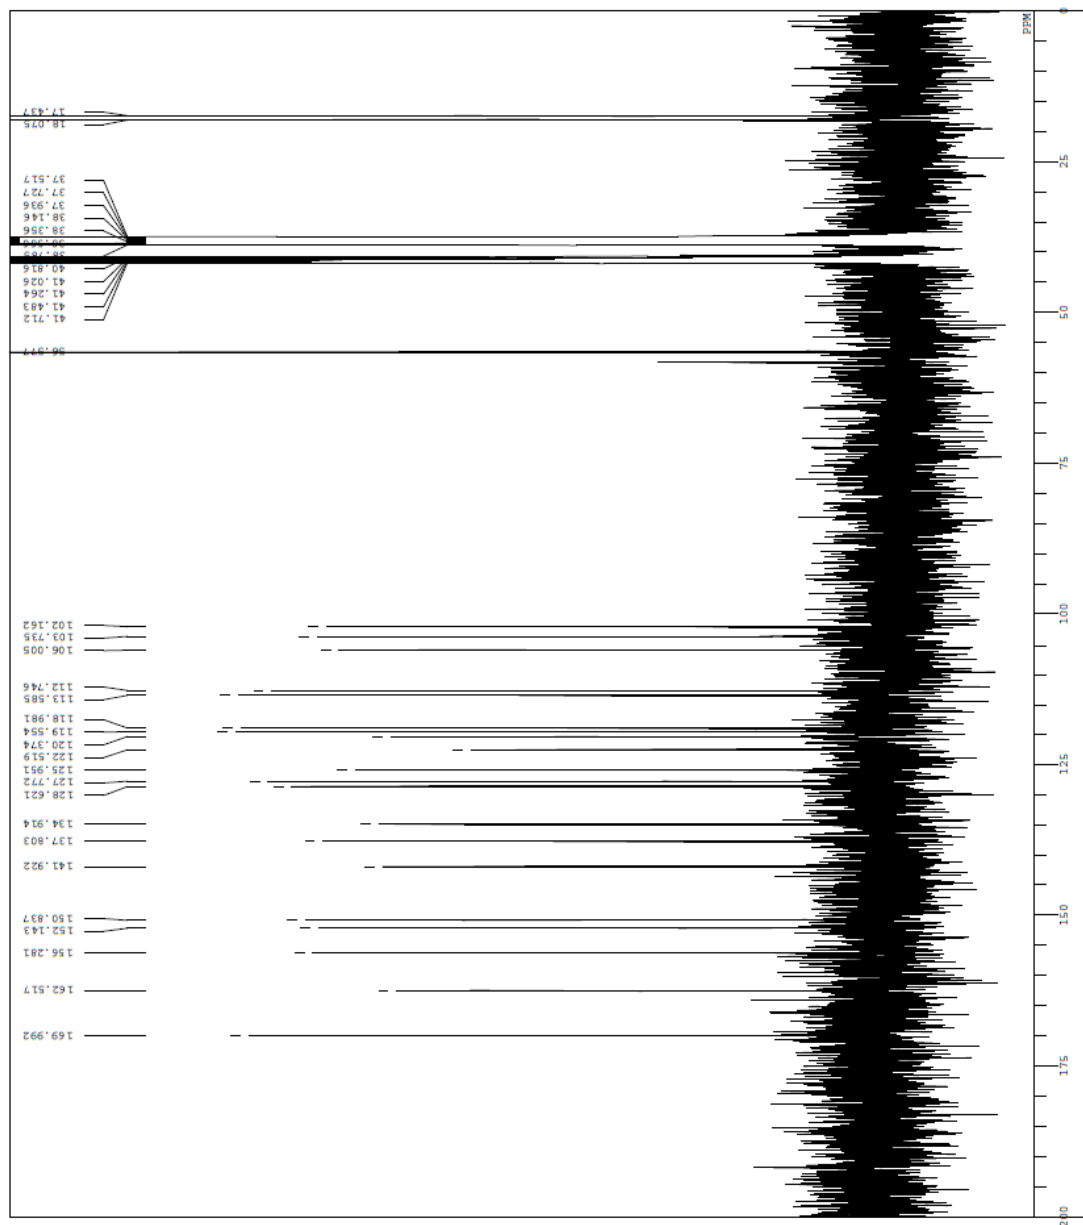

**Fig. S6**  $^{13}\text{C}$  NMR chart of **1'** (49 mM, DMSO- $d_6$ , 100 MHz).

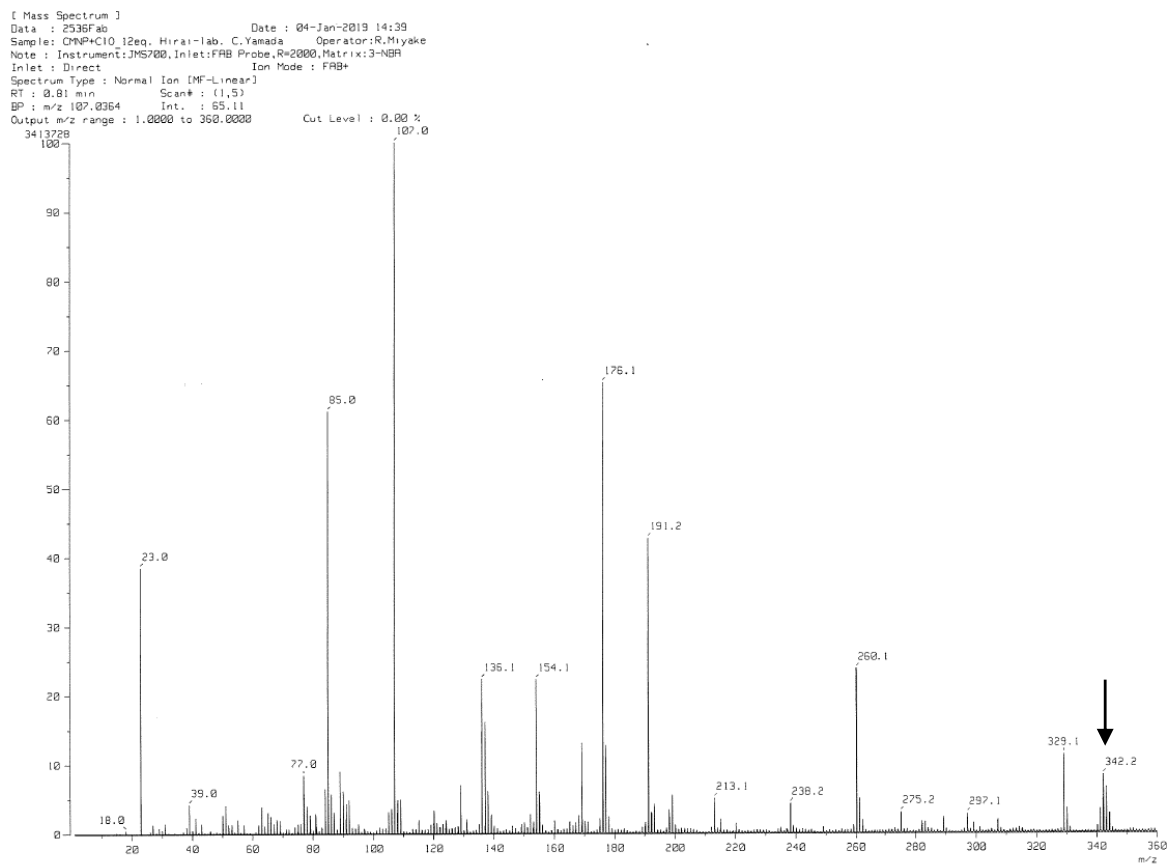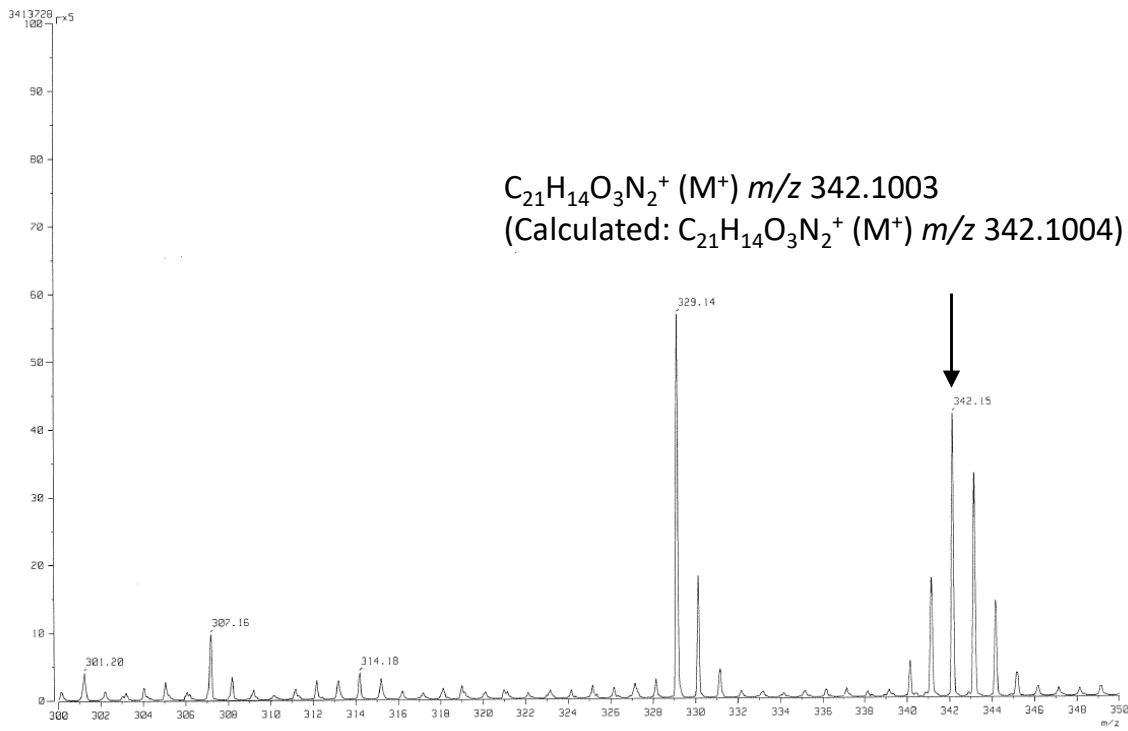

**Fig. S7** FAB-MS chart of **1'**. (top) full and (bottom) partial charts.

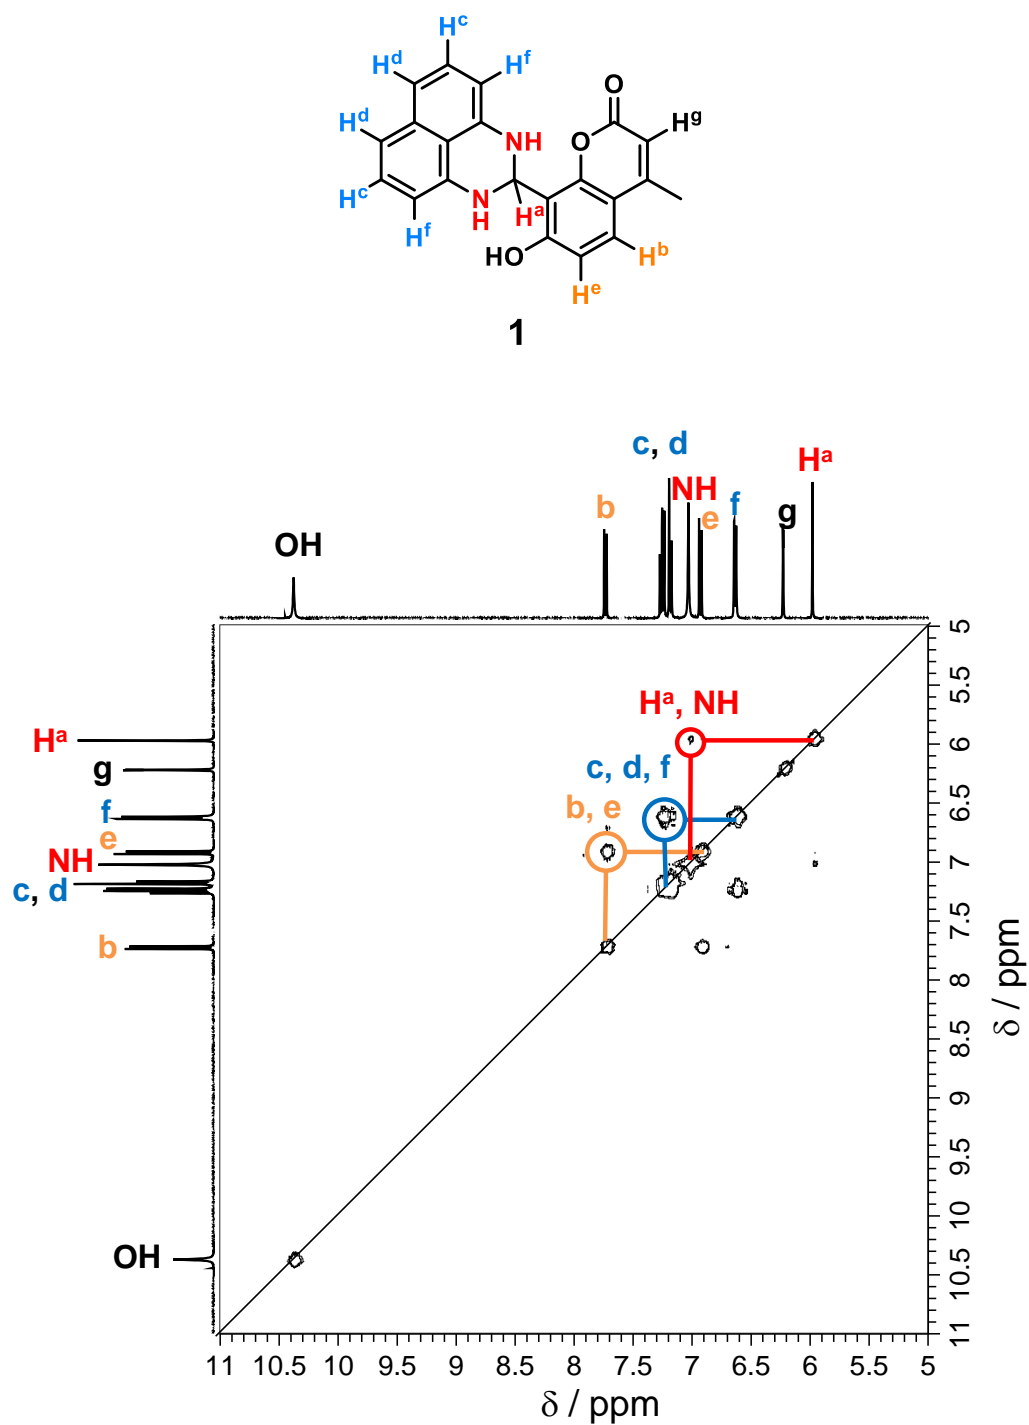

**Fig. S8**  $^1\text{H}$ - $^1\text{H}$  COSY chart of **1** (30 mM,  $\text{DMSO-d}_6$ , 400 MHz). Colored circles indicate the observed cross peaks. The texts next to the circle mean the coupling protons.

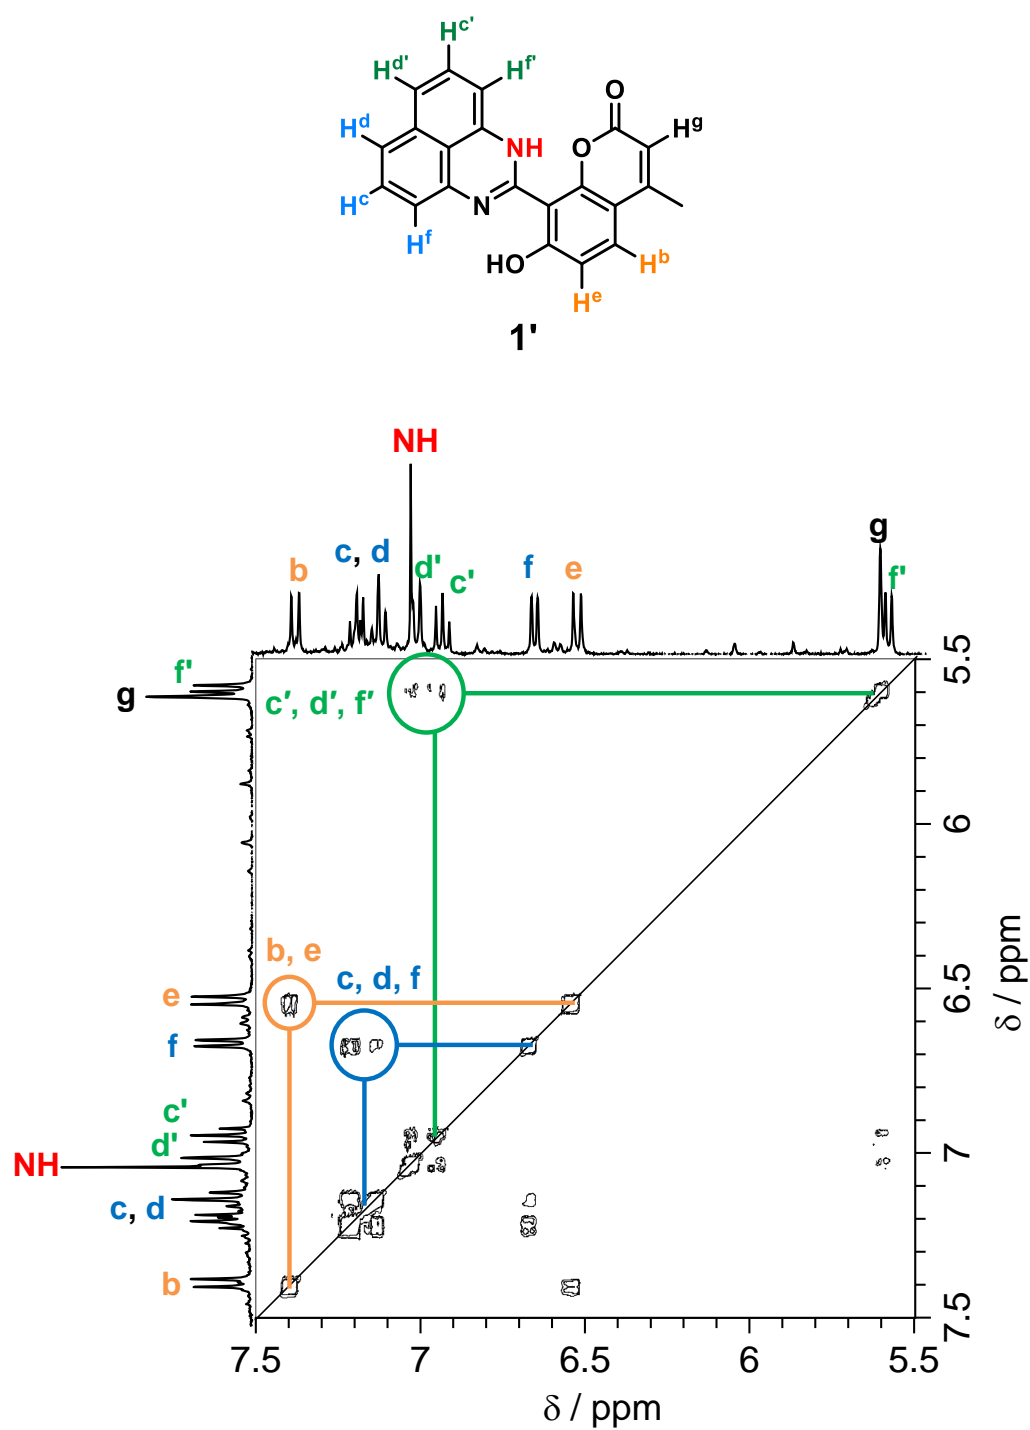

**Fig. S9**  $^1\text{H}$ - $^1\text{H}$  COSY chart of **1'** (30 mM,  $\text{DMSO-d}_6$ , 400 MHz). Colored circles indicate the observed cross peaks. The texts next to the circle mean the coupling protons.

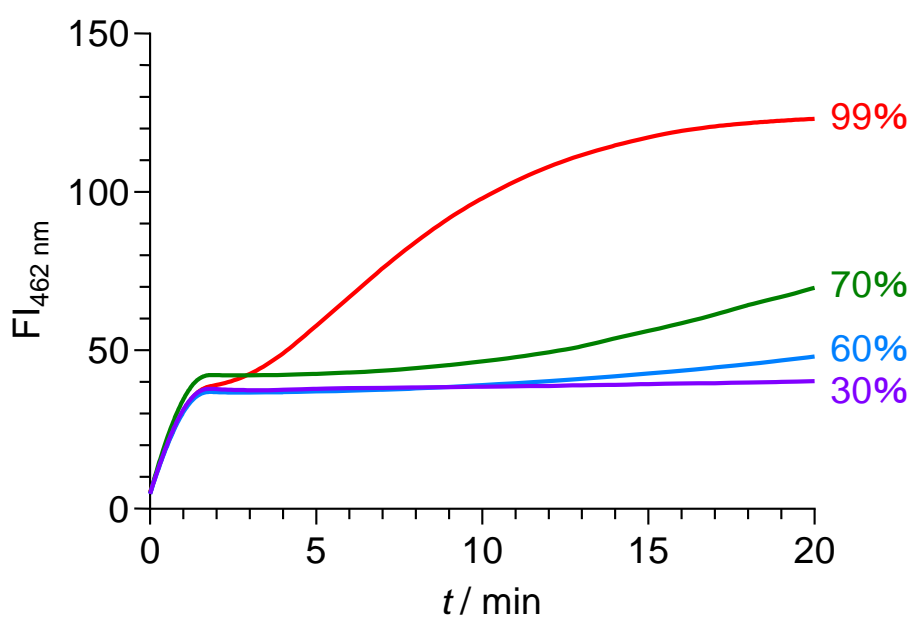

**Fig. S10** Time-dependent change in the fluorescence intensity of **1** at 462 nm (10  $\mu$ M) after addition of  $\text{OCl}^-$  (50 equiv) measured at 25  $^\circ\text{C}$  in MeCN solutions (HEPES 0.1 M, pH 7.0) with different water contents.

Cartesian Coordinates (in Å) of **1** (DFT/B3LYP/6-31+G\*)

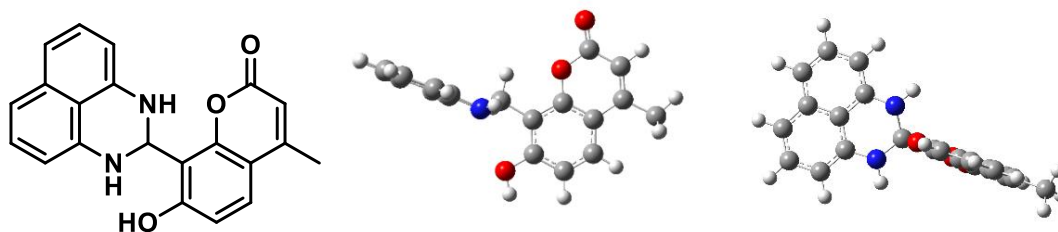

|   |          |          |          |   |          |          |          |
|---|----------|----------|----------|---|----------|----------|----------|
| C | -2.59998 | 2.665419 | -0.00016 | C | 3.059685 | -0.05288 | -2.43551 |
| C | -1.30104 | 2.122463 | -0.00013 | H | -2.72707 | 3.746045 | -0.00022 |
| C | -1.10217 | 0.727232 | -3.1E-05 | H | -4.69881 | 2.275944 | -0.00012 |
| C | -2.25129 | -0.08475 | 0.000018 | H | -5.22576 | -2.56471 | 0.000175 |
| C | -3.5653  | 0.436016 | -1.2E-05 | H | 0.169034 | -0.99211 | 0.000113 |
| C | -3.70712 | 1.835229 | -0.0001  | H | -0.49296 | 3.859368 | -0.00026 |
| O | -2.04423 | -1.43422 | 0.000097 | H | -6.29185 | 0.645239 | 0.883376 |
| C | -3.08388 | -2.37208 | 0.00018  | H | -6.29183 | 0.645076 | -0.88353 |
| C | -4.4286  | -1.82921 | 0.00013  | H | -6.81258 | -0.8015  | 0.000053 |
| C | -4.68196 | -0.4931  | 0.000039 | H | 0.53197  | 0.374526 | 2.045974 |
| C | 0.283028 | 0.10234  | 0.000012 | H | 0.531927 | 0.374141 | -2.046   |
| O | -0.21267 | 2.930196 | -0.00019 | H | 2.539396 | 0.096748 | 3.379357 |
| C | -6.09647 | 0.0244   | -1.8E-05 | H | 4.939409 | -0.5332  | 3.380705 |
| O | -2.7745  | -3.54241 | 0.000175 | H | 6.165051 | -0.8784  | 1.257772 |
| N | 1.043652 | 0.518103 | 1.182202 | H | 6.165027 | -0.87863 | -1.25769 |
| C | 2.379962 | 0.110716 | 1.236732 | H | 4.939344 | -0.53382 | -3.38066 |
| C | 3.066915 | -0.08666 | 0        | H | 2.539331 | 0.096131 | -3.37938 |
| C | 2.379938 | 0.110493 | -1.23675 |   |          |          |          |
| N | 1.043627 | 0.517892 | -1.18227 |   |          |          |          |
| C | 3.059732 | -0.05244 | 2.435509 |   |          |          |          |
| C | 4.426643 | -0.40805 | 2.429927 |   |          |          |          |
| C | 5.113351 | -0.60361 | 1.248362 |   |          |          |          |
| C | 4.452032 | -0.44108 | 0.00002  |   |          |          |          |
| C | 5.113327 | -0.60384 | -1.24831 |   |          |          |          |
| C | 4.426596 | -0.4085  | -2.42989 |   |          |          |          |

Cartesian Coordinates (in Å) of **1'** (DFT/B3LYP/6-31+G\*)

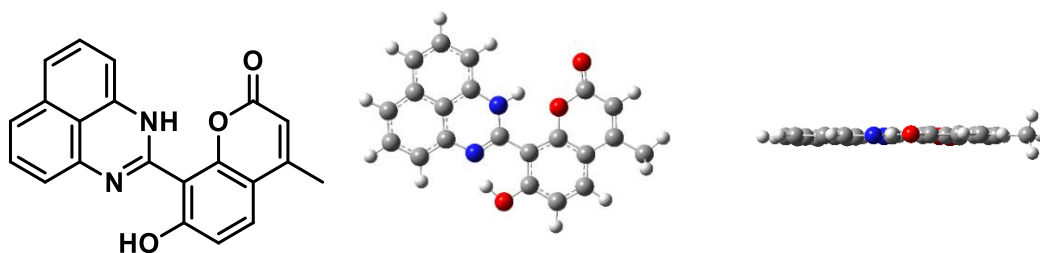

|   |          |          |          |   |          |          |          |
|---|----------|----------|----------|---|----------|----------|----------|
| C | -2.39828 | 2.535728 | 0.004035 | O | 0.468111 | -3.3021  | 0.001439 |
| C | -3.77172 | 2.877929 | 0.004016 | H | -1.63685 | 3.314675 | 0.005575 |
| C | -4.76072 | 1.911836 | 0.002177 | H | -4.04639 | 3.932516 | 0.005508 |
| C | -4.41637 | 0.529281 | 0.000242 | H | -5.81255 | 2.196413 | 0.002197 |
| C | -3.03233 | 0.179967 | 0.00024  | H | -6.43152 | -0.28443 | -0.00179 |
| C | -2.04167 | 1.196913 | 0.002172 | H | -5.69292 | -2.64723 | -0.00507 |
| C | -5.36951 | -0.52877 | -0.00175 | H | -3.26806 | -3.23395 | -0.00498 |
| C | -4.95165 | -1.84821 | -0.00358 | H | 4.800607 | -2.23354 | 0.002606 |
| C | -3.57993 | -2.1905  | -0.00354 | H | 2.934406 | -3.84995 | 0.002979 |
| C | -2.62046 | -1.18539 | -0.00166 | H | 4.992548 | 2.628992 | -0.00221 |
| N | -1.25928 | -1.49611 | -0.00159 | H | 6.247798 | -0.50404 | 0.88488  |
| C | -0.35063 | -0.54241 | 0.000165 | H | 6.248926 | -0.5056  | -0.88068 |
| N | -0.7061  | 0.774861 | 0.002072 | H | 6.670849 | 0.977479 | 0.00106  |
| C | 1.076946 | -0.95218 | 0.000509 | H | -0.4405  | -2.81595 | -9.1E-05 |
| C | 2.178517 | -0.05788 | -0.00022 | H | 0.02803  | 1.473898 | 0.003469 |
| C | 3.521757 | -0.47823 | 0.000672 |   |          |          |          |
| C | 3.776708 | -1.86895 | 0.001968 |   |          |          |          |
| C | 2.744403 | -2.77822 | 0.002216 |   |          |          |          |
| C | 1.40121  | -2.34592 | 0.001351 |   |          |          |          |
| O | 1.90004  | 1.282537 | -0.00205 |   |          |          |          |
| C | 2.871409 | 2.285091 | -0.00329 |   |          |          |          |
| C | 4.236283 | 1.846849 | -0.00165 |   |          |          |          |
| C | 4.569175 | 0.521925 | 0.000124 |   |          |          |          |
| C | 6.01435  | 0.103494 | 0.001417 |   |          |          |          |
| O | 2.454138 | 3.435226 | -0.00571 |   |          |          |          |

Cartesian Coordinates (in Å) of **1''** (DFT/B3LYP/6-31+G\*)

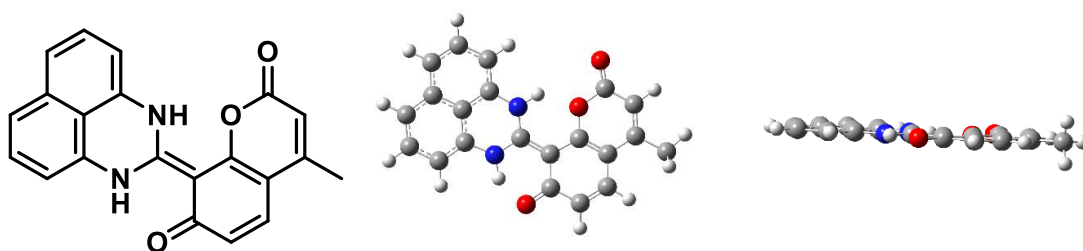

|   |          |          |          |   |          |          |          |
|---|----------|----------|----------|---|----------|----------|----------|
| C | -2.37416 | 2.522559 | -0.00129 | O | 0.483158 | -3.3102  | -0.00283 |
| C | -3.7451  | 2.878156 | -0.00031 | H | -1.60664 | 3.295546 | -0.0021  |
| C | -4.74181 | 1.92105  | 0.000792 | H | -4.00934 | 3.935198 | -0.00041 |
| C | -4.4108  | 0.53598  | 0.000971 | H | -5.7911  | 2.214756 | 0.001571 |
| C | -3.03094 | 0.177156 | -3.5E-05 | H | -6.43313 | -0.259   | 0.002969 |
| C | -2.03019 | 1.183408 | -0.00114 | H | -5.71618 | -2.62907 | 0.003345 |
| C | -5.37365 | -0.51358 | 0.002171 | H | -3.29944 | -3.23985 | 0.001656 |
| C | -4.96965 | -1.83544 | 0.002371 | H | 4.815675 | -2.22837 | 0.002315 |
| C | -3.59918 | -2.1923  | 0.001382 | H | 2.979776 | -3.86025 | 0.000617 |
| C | -2.64666 | -1.18944 | 0.00016  | H | 4.980906 | 2.638133 | 0.002026 |
| N | -1.27325 | -1.46935 | -0.00077 | H | 6.249434 | -0.48788 | 0.885605 |
| C | -0.30687 | -0.53777 | -0.00158 | H | 6.251229 | -0.48776 | -0.87957 |
| N | -0.68937 | 0.758337 | -0.00192 | H | 6.661218 | 0.997367 | 0.003554 |
| C | 1.084074 | -0.97029 | -0.0016  | H | 0.044764 | 1.459333 | -0.00241 |
| C | 2.183708 | -0.0667  | -0.00094 | H | -0.89967 | -2.44376 | -0.00078 |
| C | 3.526125 | -0.47506 | 0.000374 |   |          |          |          |
| C | 3.786633 | -1.87659 | 0.001054 |   |          |          |          |
| C | 2.77247  | -2.79149 | 0.000165 |   |          |          |          |
| C | 1.386249 | -2.4033  | -0.00182 |   |          |          |          |
| O | 1.897803 | 1.271479 | -0.00137 |   |          |          |          |
| C | 2.864031 | 2.286576 | -0.00023 |   |          |          |          |
| C | 4.225091 | 1.855903 | 0.001149 |   |          |          |          |
| C | 4.56151  | 0.526302 | 0.001369 |   |          |          |          |
| C | 6.01094  | 0.118632 | 0.00282  |   |          |          |          |
| O | 2.429016 | 3.432491 | -0.00014 |   |          |          |          |
